# Supplementary material
Source: publisher figshare collection journal article supplement (https://gsapubs.figshare.com/ndownloader/files/28547553)
Supplement: Supplementary file 1 [file 28547553]

Table S1. Raw gamma and facies rank data
meter (TT section)	DR (Rh^(-1))	K (%)	U (ppm)	Th (ppm)	rank		meter (TT detail)	DR (Rh^(-1))	K (%)	U (ppm)	Th(ppm)		meter (EM section)	DR (Rh^(-1))	K (%)	U (ppm)	Th (ppm)	Rank		m (EM detail)	DR (Rh^(-1))	K (%)	U (ppm)	Th(ppm)
0	8.6	2.6	4.1	7.1	3		350	6.8	1.6	4.5	5.7		0	7.4	1.3	6.9	4.1	3		353.5	7.5	1.5	5.3	6.6
1	6.8	1.8	3	7.4	3		350.5	8	2	4.1	8.4		1	6.2	0.9	5.3	5	3		354	5.4	0.9	3.7	5.6
2	6	1.6	4.1	3.5	3		351	8.1	1.7	5	8.1		2	5.3	0.8	4.5	4.1	1		354.5	9.5	1.8	7.1	7.8
3	6	1.8	2.9	5	3		351.5	8.9	2.3	4.6	8.5		3	6.4	1.6	4	5	3		355	8.2	1.6	5.6	7.9
4	5.6	1.3	4	4	3		352	8.7	1.9	4.5	10.3		4	4.8	0.7	3.9	4.3	1		355.5	9.6	1.8	6.3	9.8
5	7.1	2	3.5	6.5	3		352.5	7.5	1.7	3.9	8.4		5	6	0.7	5.4	5.3	1		356	7	1.3	4.6	7.2
6	8.6	3	2.7	8.2	3		353	6.9	1.5	4.3	6.3		6	3.9	0.6	3.2	3.4	3		356.5	6.9	1.5	4.6	5.5
7	5.4	1.4	2.3	6.2	3		353.5	5.8	1.2	3.9	5.2		7	4.1	0.6	3.6	2.8	3		357	5	0.7	3.9	5.1
8	4.2	0.9	2.4	4.2	3		354	5.4	0.9	3.7	5.7		8	5	0.8	3.8	4.7	3		357.5	6.6	0.9	5.3	6.3
9	5.7	1.3	3.7	4.4	3		354.5	7.1	1.6	3.7	7.9		9	9.2	2	5.9	8	1		358	5.9	1.2	5	3.4
10	5	1.2	2.7	4.9	3		355	7.7	2.1	3.5	7.8		10	11	2.9	6	10	3		358.5	8.4	1.8	5.8	7.2
11	5.7	1	3.2	7.2	2		355.5	6.9	1.7	3.2	7.7		11	9.9	2.3	6.1	9	3		359	8.7	1.9	5.7	7.8
12	5.1	1	3.1	5.7	3		356	7.5	1.8	4.5	6.8		12	12	3.1	6.9	10.1	1		359.5	7	1.7	4.6	5.3
13	6.6	1.7	2.7	7.8	2		356.5	5.3	0.6	4.4	5.3		13	12	3.1	6.9	10.1	1		360	8.2	1.6	5.6	8
14	7.2	2.2	3.1	6.5	2		357	7	1.4	4.5	6.8		14	9.5	2.1	4.6	11	1		360.5	7.9	1.7	5.4	6.7
15	4.1	1.1	2	4.1	2		357.5	6.5	1.1	4.8	6		15	6.1	1.1	4.6	5.4	3		361	8.6	2	4.9	8.5
16	5.5	1.5	2.9	5.1	2		358	7.8	1.7	5.7	5.7		16	7.7	1.5	5	7.9	3		361.5	6.2	1.1	4.1	6.6
17	4.1	0.8	2.3	4.8	2		358.5	7.3	1.1	5.8	6.6		17	6.4	1	4.8	6.3	3		362	8.5	2	4.9	8.2
18	2.7	0.4	1.8	3.2	3		359	7.5	1.6	4.5	7.7		18	6.4	1	4.7	6.6	3		362.5	10.1	1.8	7.1	10
19	5	1.1	2.7	5.5	2		359.5	7.3	1.6	5	6		19	5.3	0.9	3.6	5.6	3		363	5.6	0.9	3.6	6.8
20	4.8	1.2	2.9	4.2	2		360	5.9	1.3	4.2	4.4		20	7	0.9	5.7	7	3		363.5	8.7	2	4.6	9.6
21	3.7	0.7	2.4	4.1	2		360.5	5.9	1.1	3.8	5.9		21	5.5	0.7	5.1	4.1	3		364	6.8	1.4	5.2	4.9
22	4.5	0.8	3.1	4.2	2		361	6.3	1.4	3.1	7.5		22	8.5	1.8	6	6.8	3		364.5	6	1.2	4.7	4.1
23	2.5	0.3	2.3	2	2		361.5	6.9	1.5	4.2	6.8		23	6.7	1.1	5.5	5.3	4		365	7.3	1.5	4.3	7.9
24	3.6	0.6	2.7	3.1	3		362	7.2	1.3	4.8	7.6		24	7	1.5	4.6	6.4	3		365.5	7	1.5	4.6	6
25	4.7	1	3.3	3.6	3		362.5	6.1	1.2	3.1	7.8		25	7.8	1.6	5.5	6.3	3		366	6.7	1.5	4.1	6.1
26	2.2	0.4	1.1	3	3		363	7.9	1.7	4.8	7.7		26	7.2	1.6	4.2	7.2	1		366.5	7.6	1.6	4.1	8.7
27	2	0.3	1.7	1.6	3		363.5	7.3	1.5	4.1	8		27	8.7	2	5.4	7.4	1		367	9.3	2.4	5.1	8.1
28	3.4	0.8	2	3.4	3		364	6.4	1.5	3.5	7		28	7.4	1.8	5.4	4.4	2		367.5	4.1	0.9	3.1	2.6
29	4	0.8	2.7	3.7	3		364.5	7.3	1.9	3.8	7.2		29	9.1	1.8	7.2	6.2	2		368	6.1	1.2	3.5	7.1
30	2.4	0.5	1.4	2.5	3		365	6.7	1.6	3.6	6.8		30	6.3	1.4	4.7	4.2	2		368.5	5.5	1.1	3.6	5.1
31	6	1.5	3.6	5	3		365.5	4.5	0.6	3.7	4.1		31	6.7	1.7	3.9	5.8	2		369	6.7	1.4	4.6	5.8
32	4.4	1.1	2.4	4.1	3		366	5.5	1.1	3.4	5.4		32	4.5	0.9	3.1	4.4	4		369.5	7	1.6	4.8	5.5
33	5.2	1	3.2	5.4	3		366.5	6.3	1.1	4.2	6.9		33	6.7	1.7	3.8	5.6	3		370	7.7	1.7	5.9	5
34	5.4	1.4	2.3	5.8	3		367	5	0.7	3.7	5.4		34	6.5	1.6	3.9	5.4	3		370.5	6.7	1.7	3.7	5.9
35	5.2	1.4	2.1	5.7	3		367.5	6.3	1.2	3.7	7.2		35	5.5	1.2	3	5.9	1		371	7.8	1.8	5.1	6.5
36	4.4	1.2	2	4.5	3		368	7.7	1.6	5	7.1		36	6.2	1.1	5.2	4.4	1		371.5	8.6	2.3	4	8.8
37	6	2	2.2	5.6	1		368.5	7.3	1.3	4.1	9.6		37	6.2	1.4	3.8	5.6	1		372	7.4	1.6	5	6.2
38	5.8	1.5	2.8	5.9	1		369	6.5	1.1	4.4	6.9		38	7.2	1.7	4.5	6	1		372.5	6.3	1.3	4.4	5.3
39	4.2	0.7	3.3	3.7	4		369.5	7.3	1.1	5.2	8		39	7.7	2	3.7	8.2	1		373	7.9	1.6	5.5	6.9
40	7.8	1.9	4.2	7.6	1		370	8.9	1.7	5.4	10		40	7.5	1.9	4	6.9	1		373.5	5.9	1	4.9	4.3
41	10.9	2.6	5.2	12.2	1		370.5	9.3	1.7	5.7	10.4		41	6.6	1.8	4.2	4.4	3		374	5.3	1	3.6	5.6
42	7.3	1.6	4.3	7.4	1		371	6.7	1.2	4.5	6.9		42	7.9	2.2	5	5.2	3		374.5	8.3	1.5	5.4	8.9
43	7.1	1.7	3.8	7.3	1		371.5	5.6	0.8	4.6	5.3		43	5.3	1	4	4.2	3		375	7.3	1.2	4.7	8.4
44	7.1	1.6	4	7.3	3		372	6.6	1.2	4.9	5.9		44	5.3	1.1	3.6	4.7	3		375.5	8.5	1.9	4.3	9.5
45	4.3	1	2	5	3		372.5	8.4	1.7	4.4	10.2		45	6.2	1.3	4.3	5.1	3		376	9.2	1.7	6.8	7.9
46	5.1	1.3	2.6	5.1	1		373	7.2	1.1	5.6	6.9		46	6.4	1.3	4.6	4.9	3		376.5	6.6	0.9	5.3	6.4
47	5.2	1.3	2.3	6.4	3		373.5	6.2	1	4.6	6.2		47	7.9	2	3.7	8.8	3		377	6.6	1.3	4.5	5.8
48	4	1	1.9	4.4	3		374	6.1	1.6	3.3	5.3		48	6.6	1.4	4.9	4.8	3		377.5	6.6	0.8	5.9	5.6
49	5.7	1.3	3	6	3		374.5	6.6	1.5	4	6.3		49	6.5	1.7	3	6.8	1		378	5.6	1	3.7	5.8
50	5.2	1.2	3	5.2	1		375	7.5	1.5	4.4	8.7		50	5.3	0.9	4	5.1	3		378.5	6.1	1.2	3.9	6.2
51	4.3	0.9	3	3.7	3		375.5	6.7	1.4	4.1	6.9		51	5.8	1.2	4.3	4.6	3		379	6.9	1	4.2	9
52	3.9	1	1.3	5	3		376	5.5	0.9	4.2	4.9		52	7	1.6	4.4	5.9	3		379.5	6.2	0.8	4.9	8.1
53	4.2	0.8	2	5.9	3		376.5	5.8	1.2	3.7	5.6		53	4	0.7	3.5	2.7	3		380	5.9	1.2	3.6	6
54	3.6	0.6	1.9	3.6	4		377	6.3	1.2	4.3	6.3		54	8.9	2.2	5.6	7	1		380.5	6.5	1.2	4.4	6.3
55	3.9	0.5	2.6	5	4		377.5	8.7	1.7	6.3	7.1		55	9.5	2.6	4.9	8.4	1		381	6.8	1.3	4.2	7.5
56	4.1	0.6	2.8	4.9	3		378	7.7	1.6	4.6	7.7		56	8.7	1.9	6	7	3		381.5	7.6	1.6	5	7.1
57	6.2	1.4	3.6	6	3		378.5	7.6	1.5	5.1	7		57	7.2	1.7	4.3	6.5	3		382	9.1	1.2	8.9	6.2
58	5.1	1	3.3	5.2	3		379	7.4	1.4	5.2	6.8		58	6.3	1.5	4.1	4.7	3		382.5	7.7	1.6	5.3	6.6
59	5.8	1.1	3.1	7.4	3		379.5	9.8	2.3	6	8.9		59	6.7	1.8	4.1	5	3		383	9.1	1.9	7.3	5.7
60	6	1	3.9	6.7	5		380	8.4	1.8	5.1	8.3		60	6.7	1.5	4.3	5.8	3		383.5	8.7	1.8	6.2	7.1
61	3.8	0.5	2.9	3.8	5		380.5	7.6	1.7	4.8	6.8		61	8.2	1.6	6.2	6.3	3		384	7	1.2	5.4	6.1
62	5.5	1.1	4.2	4.2	3		381	8.8	2.2	5.3	7.2		62	7.2	1.7	4.6	6	3		384.5	10.4	2.5	5.8	10.7
63	4.1	0.7	3.1	3.9	3		381.5	8.5	2	4.8	8.5		63	9.3	2.7	4.5	8.2	3		385	9.1	1.9	4.6	10.8
64	6	1.3	3.3	6.6	1		382	7	1.7	4.8	4.9		64	6.3	1.5	3.2	6.7	3		385.5	6.6	1.5	3.2	7.6
65	6.5	1.3	3.6	7.5	1		382.5	6.2	0.9	5.5	5		65	7.8	2.2	4.5	5.7	3		386	6.9	1.7	3.5	7.3
66	4.5	0.8	2.9	4.8	3		383	6.2	1.2	4.2	5.6		66	7.8	2	4.4	6.8	3		386.5	8.7	2	6.1	6.1
67	5.2	1.2	2.4	6.4	1		383.5	5.3	1.3	3.6	3.4		67	7.2	2.2	3.2	6.7	4		387	7.7	1.6	5.4	6.7
68	5.9	1.2	3.4	6.6	3		384	5.7	1.2	3.2	6.4		68	7.7	2.1	3.7	7.8	3		387.5	8.6	1.9	6.4	5.7
69	5.2	1	3.8	4.5	1		384.5	6.4	1.8	3.2	5.9		69	8.2	2.2	4.2	7.4	1		388	6.4	1.4	4.3	5.3
70	6.6	1.5	3.6	6.9	1		385	6.7	1.8	3.1	6.8		70	6	1.6	3.7	4.5	4		388.5	7.7	1.6	5.3	6.6
71	6.9	1.3	3.5	9	1		385.5	6	1.4	3.4	5.8		71	7.5	2.2	3.5	7	3		389	7.6	1.7	5.8	4.5
72	6.3	1.1	3.9	6.9	1		386	5.8	0.8	5	4.9		72	7.2	1.7	3.4	8.7	3		389.5	9.7	2.4	6.3	7.3
73	6.3	1.8	1.8	8.4	1		386.5	5.9	1.3	4.1	4.4		73	6.5	1.8	3.5	5.5	3		390	7.1	1.3	5.8	5
74	5.1	1	2.9	6	3		387	6.4	1.5	3.7	6.2		74	6.8	1.5	3.7	7.2	5		390.5	4.9	1.1	3.3	4
75	5.5	1.1	2.7	6.7	1		387.5	6.7	1.7	3.6	6.4		75	6.7	1.5	3.6	7.2	5		391	3.5	0.7	2.2	3.4
76	4.4	0.6	3.2	5.1	1		388	6.5	1.4	3.9	6.6		76	6.7	1.6	2.6	9.1	5		391.5	3.5	0.6	2.6	3.5
77	5.6	0.9	3.9	6.4	1		388.5	5.5	1.2	2.7	6.9		77	6.2	1.3	4.4	5.1	5		392	4	0.8	3	3.8
78	3.9	0.4	2.9	4.8	3		389	6.2	1.2	4.3	5.3		78	5.2	1.2	2.3	6.3	3		392.5	5.6	1.3	3.2	5.6
79	4.1	0.8	2.2	5.2	3		389.5	5.7	1	3.9	5.9		79	7.9	1.8	5	7	1		393	4.9	1	3	5.2
80	5	1	2.2	7.3	1		390	4.6	1.1	2.8	4.2		80	4.9	1.1	2.7	5.2	1		393.5	5.4	1.2	3.9	3.9
81	4.4	0.9	2.5	5.1	1		390.5	5.2	0.9	3.7	5		81	4.8	1	3.4	4	3		394	5.5	1.1	3.9	4.5
82	2.9	0.3	2.3	3.4	3		391	3.5	0.7	2.2	3.6		82	5.5	0.9	4	5.5	3		394.5	6.6	1.5	4.2	5.7
83	5.1	0.8	3	6.6	3		391.5	5.6	1.1	3.1	6.7		83	7.4	1.7	4.6	6.5	3		395	6.3	1.7	3.3	5.8
84	6.8	1.4	4.1	7.3	3		392	5.7	1.4	3.3	5.3		84	5.4	1.2	3.6	4.3	3		395.5	7.2	1.8	4.3	6.2
85	5.8	1.2	3.2	6.8	3		392.5	4.9	1	2.5	6.2		85	7.1	1.7	3.9	7.2	3		396	5.4	1.2	2.8	5.8
86	4.6	1	3.1	3.7	3		393	5.6	1.3	2.8	6.3		86	7.8	2.2	3.3	7.9	3		396.5	4.9	1	2.9	5.4
87	5.4	1	3.4	5.8	3		393.5	5	1.2	3.3	3.8		87	10.7	2.9	4.5	11.6	1		397	4.5	0.9	3.1	4.4
88	5.1	1	3.8	4.2	3		394	5	1.2	2.8	4.8		88	7.8	2	3.8	8	3		397.5	6.2	1.2	4.4	5.4
89	7	1.4	4.3	7.2	3		394.5	7	1.8	3	8.1		89	8.5	2.1	4.9	7.6	1		398	5.7	1.1	4.3	4.9
90	4.2	0.9	2.8	3.7	3		395	9.3	2	4.8	11.1		90	6.2	1.5	3.6	5.9	2		398.5	6.5	1.6	3.8	5.9
91	4.3	0.6	3	5.2	3		395.5	6.8	1.7	3.8	6.6		91	7.8	2	4.2	7.3	2		399	7.3	1.6	5.1	5.9
92	4.8	0.9	3.3	4.5	3		396	7	1.6	4.2	6.7		92	6.1	1.2	3.7	6.3	2		399.5	5.1	1	3.8	4
93	7.5	1.6	4.8	7.6	1		396.5	5.1	1.1	3.1	5.2		93	6.7	1.6	3.8	6.5	2		400	6.6	1.4	5	4.7
94	4.3	0.8	2.2	5.7	3		397	7.6	1.9	4	7.3		94	6.3	1.5	3.2	7	2		400.5	7.7	1.3	5.3	8.1
95	6.2	1.4	3.8	5.8	3		397.5	6.8	1.5	3.9	7		95	6.6	1.7	4.1	5.2	1		401	7.3	1.8	4	6.8
96	5	0.9	3.3	5.4	3		398	5.7	1.1	3.8	5.6		96	6.1	1.4	3.7	5.8	3		401.5	10	2.5	5.4	9.3
97	4.5	0.7	3.4	4.7	3		398.5	5.8	1.1	3.5	6.4		97	5.8	1.2	4.4	4.3	3		402	8.2	2.1	4	8.3
98	6.3	1.1	4.3	6.4	1		399	4.9	0.9	2.9	5.8		98	8.3	1.9	4.4	9.1	1		402.5	7.6	1.8	4	7.8
99	7.4	1.2	5	8.3	3		399.5	6.1	1.1	3.5	7.4		99	8.2	1.8	4.5	8.9	1		403	7.8	1.8	4.6	7.5
100	5.2	0.7	3.6	6.3	1		400	6.5	1.1	4.1	7.6		100	6.1	1.4	3.1	6.9	3		403.5	7.6	1.9	4.3	6.7
101	5	1	4	3.5	3		400.5	4.8	0.9	2.7	5.7		101	5.2	1	3.8	4.4	3		404	7	2.1	2.7	7.2
102	4.3	0.8	3.6	2.9	3		401	5.9	1.2	3.2	7.1		102	6.7	1.5	4.9	4.8	3		404.5	8.1	1.7	5.4	7.3
103	4.7	1	3.1	4.4	3		401.5	4.8	1	2.2	6.4		103	6.7	1.7	3.4	6.7	3		405	6.2	1.3	3.9	6.2
104	4.4	0.8	3.5	3.4	1		402	6.2	1.2	3.9	6.4		104	5.7	1	3.2	7.2	3		405.5	6.7	1.4	4.4	6
105	6.9	1.7	3.2	7.5	3		402.5	6.6	1.3	4	7.1		105	5.4	1.3	3.1	4.9	3		406	6.4	1.4	4.4	5.6
106	7.1	1.6	4.7	6.1	3		403	5.8	1.2	3.5	6.5		106	5.2	0.9	4.1	4	4		406.5	5.3	0.8	4.2	4.7
107	4.7	0.8	3.6	4.2	3		403.5	4.3	0.8	2.9	4.4		107	9.2	2.2	5	8.9	1		407	6.3	1.2	4.3	5.7
108	5.9	1.1	3.9	6.7	1		404	5.4	0.9	3.9	5.3		108	9.3	2.4	3.9	10.6	1		407.5	6.4	1.4	3.5	7.3
109	5.7	1	4.1	5.2	3		404.5	5.4	1	3.7	5.1		109	6.3	1.4	3.7	6	3		408	7.6	1.6	5.3	6.2
110	6.5	1.5	3.9	6.3	1		405	5.8	1.1	3	7.3		110	5.3	1.1	3.3	5	4		408.5	5.5	0.9	3.8	5
111	7.8	1.3	6.3	6.5	3		405.5	6.2	1.1	3.6	7.8		111	5.6	1.4	3.2	4.8	3		409	6.4	1.2	4.9	5.1
112	5.4	0.9	4.1	5.1	3		406	5.8	0.9	3.3	7.7		112	4.4	1	2.2	4.8	3		409.5	5	0.8	4.2	4.2
113	5.7	1	4.4	4.8	1		406.5	6.2	1.2	3.6	7.2		113	9.2	2.2	5	8.8	3		410	3.8	0.6	2.7	3.9
114	6.6	1.4	4.2	6.3	3		407	4.6	0.9	2.6	5.5		114	6.5	1.4	4.4	5.3	3		410.5	6.3	1.3	4.5	4.9
115	5.1	1.1	3	5.3	3		407.5	6	1.1	3.8	6.8		115	5.9	1.3	3.3	6.2	4		411	4.6	1.2	2.7	3.7
116	4.9	0.9	2.6	6.3	3								116	6.8	1.7	4.5	4.7	3		411.5	5	1.1	3.4	3.9
117	3.9	0.7	2.5	4.4	3								117	5.9	1.2	4.2	4.7	3		412	6.2	1.3	4.4	5.2
118	5.2	1	3.3	5.5	3								118	6	1.5	3.2	5.8	5		412.5	7.3	1.5	4.5	7.4
119	5.1	0.7	4	5.2	3								119	6.4	1.6	3.8	5.6	5		413	5.9	1.5	2.9	6.2
120	4.7	0.7	3.6	4.7	3								120	6.2	1.1	5	4.5	5		413.5	7.2	1.7	3.8	7.7
121	2.6	0.4	2.7	1.2	5								121	4.2	0.8	3.4	2.9	5		414	5.1	1.2	3.2	4.5
122	3.8	0.4	4	2.4	5								122	5	1.2	3.3	3.7	5		414.5	4.5	1.1	2	5.5
123	5.5	0.9	4.2	5.3	1								123	4.6	1	3.1	3.9	1		415	3.9	0.9	2.4	3.4
124	6	1.3	2.9	7.2	3								124	4.7	1.2	3.1	3.1	1		415.5	6.2	1.2	4.8	4.9
125	5.4	0.8	2.6	8.3	3								125	6.7	1.5	4.2	5.9	5		416	5.8	1.2	4	4.7
126	5.5	0.6	4.4	6	3								126	6.9	1.5	4.2	6.7	1		416.5	5.6	1.1	3.2	6.6
127	5.8	0.8	3.9	7.1	3								127	5.6	1	3.5	6.1	1		417	7.8	1.8	5.6	5.5
128	4.8	0.8	3.3	5.2	1								128	4.1	0.7	3.4	3.1	3		417.5	8.3	1.5	6.9	5.7
129	4.7	1	2.3	5.7	3								129	3.4	0.8	2.7	2	3		418	6.9	1.4	4.8	6.1
130	4.2	0.7	2.7	5.1	3								130	6	1.2	4.4	4.7	3		418.5	7.6	1.6	5.7	5.6
131	5.8	1.1	3.4	6.6	3								131	6.2	1.2	3.1	7.9	3		419	6.9	1.4	4.5	6.6
132	8.1	1.8	5	7.6	3								132	6.1	1.5	3.8	5.2	4		419.5	6.9	1.6	5.3	4
133	7.6	1.4	5.7	6.5	3								133	6.6	1.3	4.6	5.7	3		420	7	1.3	5.7	5.1
134	7.6	1	6.7	5.8	3								134	6.8	1.5	4	6.9	3		420.5	5.1	1	3.8	4.4
135	8	1.5	5.1	8.4	3								135	6.1	1.2	3.6	6.4	3		421	6.9	1.4	4.8	5.9
136	5.5	0.9	4.2	5.2	3								136	5.4	1.4	2.9	5.1	3		421.5	9	1.9	5.9	8.4
137	7	1.4	5.1	5.6	3								137	5.9	1.2	4	5.3	3		422	4.4	0.8	3.4	3.4
138	4.3	0.8	3.4	3.1	3								138	5.7	1.2	3.5	5.6	3		422.5	4.2	1	2.9	3.2
139	6.4	1.1	5	5.5	3								139	6.6	1.5	3.2	7.8	3		423	7	1.7	4.3	5.7
140	5.6	1.2	4	4.6	3								140	5.3	0.8	4.6	4.3	4		423.5	8.4	2.3	4	8.4
141	4.4	0.9	3.2	3.8	3								141	7.8	1.8	4.7	7.1	1		424	6.5	1.4	2.9	8.4
142	5.2	1.1	3.2	4.9	3								142	7.3	1.6	5.1	5.7	1		424.5	4.6	1	2.7	4.6
143	4.9	0.8	3.9	4.2	1								143	6	1.4	3.1	6.3	1		425	7.5	1.6	4.4	7.7
144	7.4	2	3	8.1	3								144	5.1	1	3.3	5	4		425.5	6.9	1.7	4.6	5
145	6.2	1.4	3.4	6.6	3								145	4.8	1	3.4	3.8	4		426	4.2	0.8	2.5	4.7
146	3.9	0.8	2.4	4.2	3								146	6.1	1.3	3.2	7.2	4		426.5	6	1.3	3.2	6.7
147	4.2	1	2.6	3.4	3								147	6.4	1.2	4.5	6.3	3		427	7.5	1.7	5	6
148	3.6	0.6	2.9	3.3	3								148	5.4	0.8	4.9	4.1	3		427.5	6.5	1.4	3.8	6.9
149	5.8	1.3	3.6	5.1	1								149	6.4	1.5	4	5.6	3		428	8.7	2.3	3.1	10.5
150	4.6	1	2.8	4.7	3								150	6.1	1.2	4	6.1	3		428.5	5.6	1.5	3.6	3.7
151	3.9	0.6	2.9	4	3								151	4.6	0.9	3.4	4	4		429	9.6	2.7	3.9	10.5
152	6	1.1	4.1	6.2	3								152	7.3	1.3	5.4	6.7	3		429.5	7.2	1.8	4.3	6.1
153	4.9	0.8	3.3	5.3	1								153	5.6	1.3	3.4	4.8	3		430	3.7	0.7	2.1	4.3
154	7.8	1.6	4.6	8.6	1								154	4.5	0.7	4.1	3.1	3		430.5	6.8	1.6	4.7	4.9
155	8	1.3	5.5	8.5	1								155	8.7	1.8	6.2	7.1	1		431	10.3	2.4	5	11.7
156	7	0.9	6.2	5.9	3								156	4.5	0.7	3.8	3.9	4		431.5	9.5	2.3	4.9	9.6
157	7.8	1.6	4.2	8.8	3								157	5.7	0.8	5.4	3.5	4		432	8.2	1.7	4.3	9.4
158	6.9	1.5	4.6	5.9	3								158	7.8	1.4	5.8	6.9	3		432.5	7.6	2	3.6	7.8
159	5	0.8	3.7	4.7	1								159	8.4	1.5	6.2	7.4	3		433	7.4	1.7	3.5	8.7
160	7.2	1.5	3.8	8.3	3								160	9.3	1.7	7.8	6.2	4		433.5	8.3	1.9	4.6	8.2
161	6.5	1.4	4.1	5.9	3								161	6.8	1.2	5.8	4.6	3		434	9.2	2.1	5.1	9.8
162	10.2	2.5	4.8	11.1	1								162	8.9	1.7	6.5	7.7	3		434.5	7.4	1.8	3.7	8
163	4.5	0.8	2.7	5.5	3								163	8.3	1.7	6.1	6.7	3		435	6.5	1	4.4	7.6
164	4.2	1.2	2.3	3.6	1								164	8.3	1.7	5.3	8	3		435.5	6.5	1.2	4.3	6.8
165	7.5	2	3.4	8	3								165	9.2	1.8	7.1	6.9	1		436	7.1	1	4.9	8.3
166	5.6	0.9	4.4	4.8	1								166	7.6	1.7	4.3	7.6	4		436.5	7.9	1.8	3.8	9.4
167	7.6	1.8	3.9	7.8	3								167	7.5	1.6	5	6.5	4		437	7.4	1.4	4.4	8.4
168	7	1.4	3.9	8.4	3								168	7.4	1.5	5.2	6.3	4		437.5	5.6	1	3.8	5.8
169	6.5	1.6	3.6	6.1	3								169	7.3	1.6	5.1	5.8	3		438	5.9	1.2	3.7	5
170	6.5	1.8	2.9	6.5	1								170	5.5	1	4.6	3.9	3		438.5	7.1	1.3	4.9	7
171	7.4	1.7	4	7.6	1								171	7.2	1.9	4.6	5.2	1		439	6.5	1.3	3.5	7.9
172	5.7	1.6	2.5	6	3								172	5.2	0.7	4.6	4.2	3		439.5	7.2	1.5	4.7	6.5
173	5	1	3.2	5.3	3								173	5.8	0.8	4.7	5.2	3		440	6.7	1.4	3.4	8
174	5.7	1	4	5.7	3								174	5.5	0.9	5.1	3.7	1		440.5	4.7	0.8	2.7	5.8
175	7.8	1.4	6	6.5	1								175	6.9	1.1	5.6	5.7	1		441	6.4	1.4	3.5	7.1
176	8.2	1.8	3.8	10.5	1								176	6.7	1	4.6	7.3	1		441.5	8.5	1.7	5	9.1
177	7.6	1.5	5.1	7.4	1								177	7.2	1.5	5.3	5.7	1		442	7.1	1.5	3.9	8
178	7.9	1.9	4.7	7.1	1								178	5	1	3.9	3.8	5		442.5	7.1	1.8	3.6	6.9
179	6.1	1.3	3.2	6.8	3								179	6.7	1.7	4.1	5.6	5		443	6.3	1.4	3.7	6.3
180	3.9	0.4	3.8	3.2	3								180	8.7	2	6.3	5.9	1		443.5	6.1	1.5	4	6.2
181	5.1	0.8	3.4	5.5	1								181	8.3	2	4.8	7.7	1		444	7	1.4	4.1	7.9
182	7.7	2	3.8	7.6	1								182	8.3	1.4	6.1	8.2	1		444.5	6.3	1.3	3.9	6.6
183	6.1	1.1	4.1	6	1								183	7.9	1.7	4.4	8.8	1		445	9	2.3	4.7	8.7
184	5	0.9	3.3	5.5	2								184	8.6	2	5.7	6.5	1		445.5	6.8	1.3	4.4	6.8
185	4.3	0.8	4	2.3	2								185	7.8	1.7	5.1	6.8	3		446	6.9	1.3	4.9	6.5
186	2.9	0.4	2.3	2.8	2								186	7.2	1.5	4.7	6.6	3		446.5	7.7	1.6	4.6	8.2
187	7.5	1.7	5.1	6	3								187	6.4	1	4	7.6	1		447	6.6	1.2	4.3	7.2
188	7.9	1.4	5.7	7.4	2								188	6.9	1.3	5.4	5.2	1		447.5	5.2	1.1	3.5	4.6
189	4.2	0.4	4.2	3.6	3								189	7	1.6	4.9	5	1		448	5.8	1.2	4.2	4.5
190	5.4	1.1	4.1	3.9	3								190	7.7	1.5	5.2	7.3	1		448.5	2.3	0.4	2.9	0.1
191	5.2	0.9	3.5	5.5	1								191	6.9	1.5	4.7	5.4	3		449	8.2	1.7	4.4	9.8
192	8.1	2	4.1	8.1	1								192	6.6	1.2	5.3	5.2	3		449.5	5.3	1.1	3.1	5.8
193	7.9	2.1	4.6	6.4	1								193	7.8	1.4	6	6.8	4		450	6.7	1.5	3.9	6.9
194	7	1.6	3.6	7.4	3								194	5.6	1.1	4	4.8	1		450.5	8	1.7	4.8	8.7
195	8.6	2	4.4	9.5	1								195	6.7	1.3	3.6	8.4	3		451	4.3	0.5	3.7	4.2
196	6.7	1.6	3.3	7.5	2								196	6	1.1	5	4.2	3		451.5	5.1	1	3.3	5.2
197	7.8	1.7	4.4	8.1	3								197	5.3	1.3	2.4	6.3	5		452	7.5	1.9	4.1	6.6
198	5.3	0.9	2.8	7.8	3								198	7.1	1.5	4.1	7.3	1		452.5	8.3	1.7	5.8	7.2
199	6.3	1.2	4.3	6.3	3								199	5	1.3	2.7	4.3	3		453	8.5	1.8	4.8	9.4
200	6.8	1.2	4.1	8.1	3								200	5.7	1.1	3.7	5.9	3		453.5	7.1	1.9	3.3	7.1
201	6.6	1.6	3.6	6.7	3								201	5.7	1.1	2.8	7.5	3		454	6.2	1.3	4.8	3.8
202	4.4	0.6	3.4	4.6	3								202	6.4	0.9	5.3	5.7	3		454.5	8.4	2	5.2	7.5
203	6	1.2	3.6	6.2	1								203	5.2	1	3.2	5.6	3		455	9.1	1.9	6.5	7.2
204	3.2	0.7	1.1	4.7	3								204	6.8	1.4	4.5	6.4	4		455.5	9.2	2.2	5.6	8.1
205	7.3	1.4	5.6	5.7	1								205	5.8	1.1	4.4	4.6	1		456	8.6	2.2	4.1	9
206	7	1.4	5.4	5.4	5								206	5.9	1.2	3.3	6.5	4		456.5	8.1	1.6	5.1	8
207	6.8	1.5	4.2	6.5	1								207	3.4	0.4	3.1	2.7	5		457	7.8	1.4	5.1	8.2
208	5.8	1.2	4.5	4.1	1								208	3.1	0.4	3.2	1.6	5		457.5	8.5	1.9	4.5	9.4
209	7.3	1.6	4.5	7.2	1								209	4.5	0.9	2.6	4.9	1		458	8.8	1.8	5.1	10
210	6.6	1.2	4.5	6.6	1								210	5	1	3	5.4	3		458.5	8	1.5	5.8	7
211	5.4	1	3.3	6	1								211	6.7	1.5	3.8	7.1	3		459	9.1	2.4	4.4	9.1
212	8.3	1.8	5.1	8.1	3								212	7.4	1.8	4.3	6.9	1		459.5	7.6	1.5	6.2	4.9
213	6.3	1.3	3.6	6.5	1								213	8	1.9	3.7	9.3	3		460	5.6	0.9	4	5.7
214	7.8	1.6	5.4	6.9	3								214	6.6	1.5	4.2	5.8	3		460.5	6.6	1.5	3.2	7.7
215	7.3	1.7	4.7	5.9	3								215	7	1.5	4.3	6.7	1		461	6.5	1.5	4	6
216	8.3	1.8	4.6	8.8	3								216	7	1.3	4.7	6.6	5		461.5	7.1	1.4	4.3	7.7
217	8.4	1.8	5	8.3	3								217	4.2	0.5	3.6	3.9	5		462	4.5	0.6	3.9	4
218	6.2	1.5	3.4	6.4	4								218	6.7	1.5	3.8	6.6	1		462.5	6.7	1.3	3.8	7.8
219	7.9	2	3.9	8.2	3								219	5.9	1	4.2	5.8	4		463	7.3	1.9	3	8.5
220	5.8	1.3	3.9	4.6	4								220	6.6	1.3	5	5.3	1		463.5	7.7	1.9	3.2	9.5
221	6.8	1.5	4	6.8	4								221	8.3	1.5	5.7	8.1	3		464	7.7	1.8	3.9	8.9
222	8.3	1.9	4.8	8.2	3								222	6.2	1.2	4.6	5.3	3		464.5	7	1.3	4.3	7.7
223	7.2	1.5	4.6	6.8	3								223	6.6	1.6	3.7	6.1	1		465	6.2	1.3	3.7	6.4
224	4.7	0.8	3.7	3.9	3								224	6.1	1.4	3.6	5.9	1		465.5	5.7	1	3.9	5.9
225	8.3	1.6	5.4	8.1	3								225	5.1	1	3.8	3.9	3		466	4.8	0.9	3.3	4.6
226	5.1	0.8	4.5	3.7	5								226	5.6	0.9	4.6	4.3	3		466.5	5.9	1.1	3.4	6.9
227	7.6	1.6	4.3	8.5	5								227	7.2	1.3	4.6	7.9	1		467	6.5	1.5	3	7.6
228	6.6	1.3	4.1	6.9	3								228	7.6	1.6	3.5	11.2	1		467.5	7.3	1.4	4.4	8.1
229	6.4	1.3	4.4	5.5	3								229	5	0.9	3.6	5	3		468	6.4	1.4	3.5	6.9
230	6.5	1	5.6	5	3								230	6.3	1.2	3.8	6.9	3		468.5	6.1	1.3	1.4	5.2
231	6.8	1.4	4.4	6.4	4								231	4.3	0.5	3.8	3.9	4		469	4.9	0.8	3.2	5.6
232	8.1	1.8	4.4	8.7	3								232	8.5	1.7	4.5	10	3		469.5	4.8	0.8	3.1	5.1
233	7.3	1.8	4.6	6.2	3								233	7.5	1.4	4.4	8.6	3		470	4.5	0.7	2.9	5.3
234	6.4	1.2	5.3	4.3	2								234	7.3	1.6	3.6	8.8	3		470.5	6.2	1.3	3.3	7.1
235	4.7	1	3.3	3.9	4								235	6.4	1.4	3.9	6.1	3		471	6.5	1.5	3.6	6.6
236	6.2	1.3	4.5	4.9	1								236	4.6	0.7	4.1	3.5	4		471.5	6.5	1.4	4.1	6.2
237	6.1	1.2	4	5.8	4								237	6.4	1	4.6	6.7	3		472	7.3	1.6	3.8	8
238	8.1	1.6	5.3	7.7	1								238	7.1	1.5	5.2	5.7	3		472.5	5.9	1.2	3.7	5.8
239	9.3	1.9	5.8	9.5	3								239	6.7	1.6	4.4	5.2	2		473	7.3	1	6.4	6.1
240	9.9	2.2	5.2	11.3	4								240	5.1	1.2	4	2.7	2		473.5	6.8	0.9	5.3	7.3
241	8.2	1.8	5.1	7.9	3								241	4.2	0.7	4	2.4	2		474	7.4	1.2	5	8.5
242	6.4	1.1	4.5	6.4	3								242	7.3	1.9	3.8	7.1	2		474.5	7.4	1.7	3.8	8.3
243	7.2	1.4	5.3	5.8	4								243	6.3	1	5.5	4.6	3		475	5.9	1.1	3.5	7
244	8.5	1.8	5.8	7	3								244	6.3	1.4	4.7	4.3	3		475.5	5.8	0.8	4.3	6.4
245	7	1.4	4.2	7.9	3								245	7.4	1.4	4.9	7.3	1		476	6.7	1.1	4.9	6.7
246	6.7	1.5	3.6	7.5	3								246	7	1.6	4.4	6.5	1		476.5	6.4	0.9	4.8	7.2
247	7	1.4	4.1	7.4	4								247	7.1	1.5	4.2	7.5	1		477	5.4	1	3	6.8
248	8.1	1.7	4	10.1	4								248	4.7	0.9	3.7	3.4	5		477.5	6.6	1.3	3.4	8.4
249	7.6	1.4	5.3	7.3	3								249	5.8	1.1	4.1	5.3	4		478	7.2	1.1	4.2	9.5
250	8.5	1.8	4.7	9.4	3								250	7.3	1.4	5.1	6.7	3		478.5	6.3	1.1	3.2	8.6
251	9	2.2	3.5	11.6	3								251	4.9	0.7	4.1	4	3		479	4.5	0.7	3.4	4.5
252	7.2	1.4	4.1	8.1	3								252	7.2	1.3	4.4	8.3	3		479.5	6	1.2	4.4	5.1
253	7	1.4	5.2	5.4	3								253	7.8	1.6	4.8	7.8	3		480	4.9	1	3.7	3.4
254	8.3	1.9	4.8	8.2	3								254	10.2	2.2	6.9	8.6	3		480.5	5.7	1.1	3.9	5.6
255	6	1.1	4.4	5.5	4								255	7.8	1.6	5.5	6.6	3		481	5.8	0.9	4.4	5.5
256	8	1.7	4.6	8.5	3								256	6.5	1.3	4.9	4.9	3		481.5	5.2	0.7	4.1	5.3
257	7.4	1.4	5.1	7.2	3								257	8.3	2.3	4.5	7.1	3		482	6.3	1	4.4	6.7
258	5.7	1.1	3.3	6.5	3								258	6.1	1	4.8	5.1	4		482.5	4.4	0.8	3.5	3.5
259	6.6	1.3	4	7	1								259	7.7	2.1	3.3	8.2	3		483	5.6	1	4.5	4.4
260	6.6	1.5	4.5	5.3	1								260	7.7	1.7	4.1	8.4	1		483.5	5.9	1.1	4.3	5.4
261	5.3	1	4.3	3.6	1								261	6.6	1.3	4.2	6.5	1		484	5.8	1	4.2	5.5
262	5.3	1.1	4.2	3.5	1								262	5.7	1	3.9	5.7	1		484.5	4.5	0.5	3.5	5.1
263	7.3	1.8	3.5	8.1	4								263	4.3	0.9	2.1	5.5	1		485	5.9	0.8	5	5
264	4.2	0.6	3.2	4	5								264	5.1	0.8	4	4.7	1		485.5	6.1	1.2	3.9	6.2
265	6.3	1.6	3.5	6	5								265	5.6	1	3.9	5.6	1		486	6.5	1.4	4.7	4.8
266	8.2	1.7	6	6.4	1								266	5.7	0.8	4.5	5.9	1		486.5	6.8	1.1	5.3	6.1
267	8.1	1.6	6.1	6.5	1								267	5.8	1.1	3.8	5.6	1		487	5.4	0.6	5.3	4
268	7.6	1.8	5	5.9	1								268	4.9	0.7	3.8	4.7	3
269	7.6	1.5	3.7	9.7	3								269	5.8	0.9	5.3	4	3
270	5.1	0.9	4	3.9	3								270	7.4	1.6	4	8.2	3
271	4.8	0.5	4.2	4.7	4								271	7.6	1.4	3.8	10.3	3
272	5.6	1	3.3	6.7	3								272	5.4	0.9	3.9	5.6	5
273	6	1.3	3.1	7	3								273	6.2	1.2	5.3	3.9	3
274	5.4	1	2.8	6.9	3								274	5.1	0.8	4.1	4.2	4
275	5.7	1.2	3.7	5.2	1								275	4.8	0.7	3.4	5.5	3
276	6.7	1.1	4.3	7.8	4								276	8	1.9	4.5	7.5	1
277	6.9	1.5	4.7	5.7	3								277	7.9	1.9	5.1	6.3	1
278	5.2	1.1	2.7	6.1	1								278	6.9	1.6	4.4	6.2	3
279	5.6	1.2	3.3	5.5	1								279	7.2	1.4	4.7	7.1	3
280	5.1	0.8	4.4	4.1	3								280	8	2	4.4	7.3	3
281	6.3	1.2	3.7	7	3								281	4.7	0.7	2.4	7.1	3
282	5.6	1.2	3.7	6.2	3								282	6.7	1.4	4.5	6.1	3
283	4.7	0.9	2.6	5.7	4								283	6.1	1.1	3.6	7.2	3
284	5.3	0.8	3.5	6.2	3								284	6.9	1.1	4.4	7.9	1
285	5.9	0.9	4.5	6	3								285	6.9	1.3	3.6	9	1
286	5.8	1.3	2.4	7.5	1								286	7	1.3	4.5	7.5	1
287	6.4	1.5	3	7.5	1								287	7.6	1.6	5.2	6.7	1
288	5.9	1.3	2.8	7.2	3								288	4.1	0.6	3.6	3	5
289	5.4	0.9	3.8	5.7	3								289	7.1	1.1	3.9	10	3
290	6.4	1.1	4.2	7	3								290	3.3	0.6	1.5	4.9	4
291	5.9	1.4	2.5	7.5	3								291	5.2	0.9	3.1	6.3	3
292	5.8	1.3	3.2	6.2	3								292	7	1.3	5.1	6.1	3
293	3.8	0.5	2.8	4.3	3								293	4	0.8	2.5	4.2	3
294	3.2	0.3	2.8	3.2	4								294	6.6	1.4	4.3	6	3
295	5.1	0.7	3.1	7.1	4								295	6.7	1	5.7	5.2	3
296	5.6	1.1	3.4	6.5	4								296	7.2	1.5	4.7	6.9	3
297	5	1	2.4	6.3	1								297	7.3	1.4	4.8	7	3
298	5.7	0.9	3.6	6.9	1								298	5.1	0.9	3.9	4.5	4
299	5.1	1.2	3.2	4.1	1								299	8.3	1.8	5.1	8.3	1
300	5.8	1.2	3.6	6.1	1								300	6.1	1.2	3.7	6.7	4
301	6.4	1.4	2.9	8.2	3								301	5.5	1	3.1	6.7	3
302	4.6	0.7	3.2	5.1	3								302	4.2	0.6	3.1	4.5	3
303	5.5	1	3.3	6.5	4								303	4.3	0.8	2.8	4.5	4
304	4.9	0.8	3.8	4.5	3								304	6.1	1.4	3.2	6.5	1
305	5	1.1	3.1	4.9	3								305	5.5	0.9	4.9	3.9	1
306	6.5	1.4	2.9	8.6	1								306	6.2	1	4.4	6.1	1
307	6.3	1.2	4.2	6.4	4								307	6.3	1.2	3.6	7.2	1
308	6	1.3	3.2	6.7	1								308	5.9	1.1	3.1	7.7	3
309	5.9	1.1	3.7	6.5	4								309	5	0.9	3.6	4.6	3
310	6.2	1	3.9	7.4	3								310	4.3	0.7	2.8	5	4
311	6.1	1	3.8	7.4	3								311	7.1	1.4	4.5	7.6	3
312	6.2	1.2	4.3	5.8	3								312	6.4	1.2	4.2	6.5	1
313	4.7	0.9	2.8	5.3	3								313	4.7	0.6	3.5	5.3	3
314	5.3	1.1	3.4	5	4								314	3.7	0.3	3.4	3.5	4
315	5.4	0.9	2.9	7.1	1								315	6.6	1.4	4.8	5.2	1
316	6.3	1.6	3.3	6.3	1								316	7.6	2	4.2	6.8	1
317	7	1.7	4	6.6	1								317	7.6	1.6	4.7	7.5	3
318	5.8	1.4	2.7	6.5	3								318	6.1	0.8	4.3	7.2	3
319	4.8	0.8	3.5	4.7	3								319	5.8	1.2	3.5	5.8	4
320	6.3	1.5	3.4	6.7	1								320	6.9	1.2	4.2	8	4
321	5.4	1.2	2.7	6.3	4								321	7	1.7	4.1	6.1	1
322	8.4	2.1	3.8	9.4	3								322	7.4	1.3	4.7	8.3	1
323	6.3	1.4	3.3	7	3								323	6.3	1.1	4.5	6.5	3
324	5.9	1.3	3.6	5.5	3								324	6.3	1.2	3.6	7.4	4
325	8.5	1.9	4.6	9.1	2								325	5.8	0.8	4.7	5.5	3
326	5.4	1.1	4.2	3.9	2								326	5.4	0.8	4.1	5.5	4
327	7.3	1.7	3.6	8.3	2								327	5.4	0.8	4.2	5.2	4
328	5.3	1	3	6.5	2								328	4.5	0.7	3.5	4.1	1
329	7.1	1.2	4.3	8.8	3								329	6.3	1	4.8	5.7	3
330	6.4	1.4	3.6	7.1	3								330	5.8	1.1	4.4	4.7	1
331	5.4	1.1	3.4	5.4	3								331	4.4	0.5	3.5	4.8	4
332	3.6	0.8	2.3	3.4	4								332	4.9	0.6	3.9	5.1	3
333	7.3	1.5	4.1	8.2	3								333	5.3	0.7	4.3	5.5	3
334	7.2	1.2	5.1	7.5	3								334	4.2	0.5	2.9	5.6	1
335	6.5	1.1	5.1	5.5	3								335	6.9	1.2	5.1	6.1	1
336	4.7	0.8	2.8	5.8	4								336	6.8	1.3	5.5	4.7	1
337	5.7	1.3	3.4	5.3	3								337	4.1	0.6	4	2.2	4
338	6.2	1.3	2.6	8.5	1								338	5.3	1.1	3.9	4.4	3
339	5.1	1.1	2.8	5.7	3								339	7.1	1.3	4.2	8.1	3
340	5.9	1	4.1	6	3								340	6.7	1.3	4.4	6.8	3
341	5.4	1.1	3.4	5.4	4								341	6	1.2	4.4	5.2	3
342	5.1	0.6	4.3	4.7	3								342	7.8	1.6	4.9	7.7	1
343	6.2	1.3	3.2	7.3	3								343	6.2	0.8	4.7	6.6	3
344	5.2	1	3.1	5.6	3								344	7.3	1.7	3.9	7.7	3
345	5.3	1.4	3.2	4.1	3								345	3.4	0.6	3.2	1.9	3
346	6	1.2	3.2	7.7	1								346	8.8	2.4	5.3	6.5	1
347	4.8	1	3	4.9	3								347	4.6	0.6	3.2	5.6	3
348	5.3	1.1	3.1	5.6	1								348	7.4	1.5	5.1	6.6	3
349	5.4	0.8	3.6	6.4	3								349	5.6	0.9	3.9	6	3
350	4.8	0.9	2.6	5.8	3								350	6.6	1.3	3.8	7.4	1
351	5.5	1.2	2.4	7.4	1								351	7.2	1.1	5.5	7.3	1
352	8.4	1.9	4.8	8.2	1								352	6.5	1.1	5	5.5	1
353	5.8	1.4	3.6	4.6	1								353	7.6	1.6	4.2	8.6	3
354	6.6	1.3	4.5	5.8	4								354	5.2	0.5	4.6	5.2	4
355	7.7	1.3	4.5	9.5	3								355	9	1.7	5.5	10.1	3
356	7.9	1.6	5.3	7.2	1								356	6.5	1.2	4.8	5.5	4
357	5.1	0.9	3.4	5.4	3								357	5.3	0.6	4.6	5.1	3
358	6.8	1.3	4	7.5	3								358	6.5	1.4	4.1	6.2	3
359	6.1	1	4.6	5.8	3								359	7.1	1.3	5.4	6.1	3
360	6.1	1	4.4	6	1								360	7	1.3	5.3	5.7	3
361	7.2	1.3	5.7	5.5	1								361	8.9	1.7	5.6	9.7	3
362	4.9	1.1	3.3	3.9	1								362	8.7	1.8	5.3	8.7	3
363	5.8	1	3.7	6.7	1								363	5.8	0.8	5.1	4.6	1
364	7.2	1.6	3.9	7.5	1								364	6	1.3	2.9	7.4	1
365	6.7	1.5	4	6.3	1								365	7.4	1.8	3.9	7.2	1
366	6.9	1.6	3.4	7.9	3								366	6.8	1.7	3.9	6.2	1
367	7.1	1.5	4.9	6	3								367	7.2	1.6	3.9	7.9	1
368	8.6	2.1	4.4	8.9	1								368	6.5	1.5	4.1	5.7	1
369	6.5	0.9	5.4	5.7	3								369	6.4	1.5	4	5.6	1
370	8.3	1.9	3.7	10.3	1								370	7.1	1.7	3.8	6.8	1
371	6.1	1.1	3.7	6.9	3								371	7.8	1.9	4.2	7.8	1
372	6.1	1.3	3.7	6.4	3								372	7.2	1.8	4.6	5.7	1
373	7.3	1.3	4.8	8.8	3								373	6.7	1.4	3.6	7.8	3
374	7.3	1.8	3.2	8.8	1								374	7	1.5	4.8	5.9	3
375	7.5	1.9	3.8	7.3	1								375	8.6	1.8	5.3	8.4	3
376	5.6	0.9	4.6	4.9	3								376	7.6	1.6	5.2	6.5	4
377	6.9	1.4	4.6	6.3	3								377	6.6	0.8	5.9	5.8	3
378	8	1.9	5	6.7	1								378	7.2	1.5	4.2	7.9	1
379	7.8	1.3	5.8	7.6	1								379	5.9	0.8	5.3	4.7	1
380	7.5	1.7	4.7	6.5	1								380	7.8	0.9	6.8	7.2	1
381	9.9	2.1	6.5	8.8	1								381	8.3	1.2	8	5.1	1
382	8.2	1.7	5.5	7.2	1								382	9.3	1.7	7.9	5.8	1
383	7.2	1.3	6.1	4.7	1								383	9.4	1.9	6.5	8.7	1
384	5	1.2	3	4.6	1								384	6.6	1	6	4.4	1
385	5.6	1.4	3.1	5.2	1								385	9.4	2.1	5.9	7.3	1
386	5.6	1.1	3.9	5.1	3								386	7.2	1.5	4.6	6.6	1
387	7.4	1.9	4.3	6.1	1								387	8.2	1.6	5.6	8	1
388	6.2	1.2	4	6.2	1								388	7.3	1.7	5.2	5.1	1
389	6.4	1.1	4.6	6.1	3								389	7.8	1.5	6.8	4.4	1
390	6.2	1.2	3.9	6.9	1								390	6.8	1.4	5.7	4	1
391	3.6	0.7	2.7	2.7	3								391	6	0.8	5.7	4.2	1
392	6.8	1.4	4.1	7	1								392	5.6	0.8	4.7	4.9	3
393	6.9	1.4	3	9.3	1								393	5	1.1	3.1	4.8	3
394	4.4	1	2.3	5.2	3								394	5.9	1.2	3.9	5.3	1
395	8.9	2.1	3.3	12.6	1								395	6.9	1.3	4.9	6.2	1
396	7.1	1.7	3.2	8.3	1								396	5.9	1.4	3	6.4	1
397	6.6	1.7	2.9	7.4	1								397	4.8	1	2.7	5.4	3
398	6.5	1.2	3.7	7.6	3								398	6	1.2	4.6	4.7	3
399	6.3	1	4.1	7.6	1								399	8.3	1.9	5.3	6.7	3
400	6.3	1.2	3.3	8	3								400	8.4	1.9	5.7	6.8	1
401	5.4	1.1	3	6.4	1								401	9.8	2	7	8.2	1
402	5	1	2.5	6.4	4								402	7.3	1.7	5	5.8	1
403	6.7	1.8	3.4	6.4	1								403	8.9	2.3	5.7	6.4	1
404	6.1	1.1	4.7	4.9	3								404	7.7	1.9	3.6	8.7	1
405	7	1	4.4	9	3								405	6.3	1.2	4.4	5.7	4
406	5.1	1.1	3	5.5	3								406	8	1.5	5.5	7.6	1
407	5.4	1	3.3	6.3	3								407	6.7	1.4	4.1	6.4	1
408	7.8	1.7	4.1	9	3								408	6.4	1.1	5.3	4.9	1
409	5.3	1	2.8	6.9	1								409	6.4	1.4	4.7	4.8	1
410	6.1	1.4	3.4	6.2	1								410	6	1.1	4.1	5.8	3
411	5.8	1.1	3.1	7.3	3								411	6.9	1.4	4.6	6.4	1
412	6.1	1.2	3	7.9	1								412	6.3	1.2	4.2	6.2	1
413	nd	nd	nd	nd	nd								413	7.5	1.6	3.7	8.9	1
414	nd	nd	nd	nd	nd								414	7.1	1.4	4.4	7.5	4
415	nd	nd	nd	nd	nd								415	5.7	1	3.7	6.4	3
416	nd	nd	nd	nd	nd								416	6.9	1.3	5.6	4.7	1
417	nd	nd	nd	nd	nd								417	7	1.4	4.3	7.3	1
418	nd	nd	nd	nd	nd								418	7.5	1.5	5.2	6.7	1
419	nd	nd	nd	nd	nd								419	7.8	1.5	5.9	6.4	3
420	nd	nd	nd	nd	nd								420	6.5	1.4	4.3	5.9	3
421	nd	nd	nd	nd	nd								421	7.5	1.3	5.3	7.3	1
422	nd	nd	nd	nd	nd								422	5.7	1.2	4	4.7	3
423	nd	nd	nd	nd	nd								423	6.7	1.6	3.8	6.3	1
424	nd	nd	nd	nd	nd								424	7	1.7	3.9	6.8	3
425	nd	nd	nd	nd	nd								425	8.6	2.1	5	7.7	1
426	nd	nd	nd	nd	nd								426	3.4	0.8	2.1	3.3	3
427	nd	nd	nd	nd	nd								427	6.8	1.6	4	6.4	1
428	nd	nd	nd	nd	nd								428	8	2.1	3.4	9.3	1
429	5.9	1.4	2.9	6.4	3								429	9.9	2.6	3.8	11.7	3
430	6.1	1.3	3.1	7.4	1								430	4.3	0.8	2.8	4.7	1
431	4.6	0.9	3.2	4.2	3								431	8.3	2.2	4.3	7.2	1
432	5.9	1.1	3.7	6.7	3								432	8.6	1.6	4.4	11.5	1
433	6	1.1	3.5	7.3	1								433	7.3	1.6	4.6	6.9	1
434	5.1	0.6	4	5.6	3								434	8.6	1.9	4.8	8.9	3
435	5.3	0.9	4.9	7.9	1								435	8	1.7	4.3	9.6	3
436	7	1.4	4.6	6.7	1								436	6.4	1	4.8	6.3	1
437	9.8	1	2	6.7	1								437	8.6	1.8	6.2	6.8	1
438	5	1	3	5.6	3								438	6.7	1.1	4.9	6.5	3
439	4.9	0.8	3	5.9	1								439	5.4	0.9	3.6	6.2	1
440	5.5	1.2	3.3	5.3	3								440	6.7	1.2	4.9	5.9	1
441	5.5	1.2	3.6	4.8	3								441	5.6	0.7	4	6.5	3
442	6.8	1.2	4.6	7.2	3								442	7.6	1.6	4.8	7.5	1
443	6	1	3.7	7	1								443	7.2	1.4	4.2	8	3
444	6.6	1	4.8	6.9	1								444	7.2	1.5	4	8.4	4
445	4.6	0.4	4.5	3.8	4								445	10.2	2.4	4.3	13	1
446	6.6	1.3	3.6	7.8	1								446	7.3	1.1	5.9	6.6	3
447	6.3	1.2	3.5	7.7	1								447	7.4	1.1	5.7	7.4	3
448	5.1	1	2.7	6.1	1								448	6.4	1.2	4.2	6.6	3
449	3.7	0.6	3.1	3.3	4								449	7.6	1.8	4	8.3	1
450	5.3	0.8	3.8	5.7	3								450	7.7	1.5	6	5.8	3
451	5.5	1.3	2.9	5.5	1								451	4.8	0.7	3.3	5.5	3
452	6.3	1.4	3.1	7.5	1								452	7.9	1.9	4.2	8	1
453	5.7	1	3.7	5.9	1								453	7.2	1.8	4.4	5.8	1
454	5	0.9	2.7	6.5	3								454	6.8	1.6	4.6	5.2	1
455	5.3	1	3.7	4.7	3								455	9.6	2.1	6.7	7.4	3
456	6.3	1	3.6	8.2	1								456	8.4	1.7	5.7	7.5	1
457	5.9	1.2	4.3	4.8	3								457	10	1.9	6.5	10.1	3
458	5.9	1.1	3.6	6.4	1								458	8.7	2.1	5.3	7.6	1
459	7	1.5	5	6.5	1								459	8.3	1.6	5.7	7.6	1
460	6	1.1	3.7	6.7	1								460	7.9	1.7	3.6	10.1	3
461	4.8	1	3.5	3.7	3								461	6.3	0.9	4.9	6.2	3
462	6.2	1.1	3.9	7	3								462	4.1	0.6	3	4.8	3
463	6.5	1.1	4.8	6	3								463	7.3	1.4	4.3	8.2	1
464	7.1	1.3	5.7	5.2	1								464	8	1.6	5	8.4	1
465	6.3	1	5.1	5.2	1								465	4.5	0.5	3.8	4.3	4
466	5.9	1.2	4.1	5.2	1								466	5.7	0.6	5.1	5.3	3
467	5.5	1.1	3.5	5.5	1								467	7	1.4	3.6	8.6	3
468	6.1	1.6	3.6	4.7	1								468	6.5	1.1	4.2	7.5	3
469	3.7	0.6	3.4	2.2	3								469	5.5	1	3.7	5.8	3
470	3.1	0.5	2.1	3.4	3								470	5.7	0.8	4	6.4	3
471	4.3	0.8	2.4	5.1	3								471	7.1	1.2	4.2	8.7	1
472	4.9	0.7	3.5	5.6	3								472	7.2	1.5	4.3	7.5	3
473	6.1	1.2	4.3	5.3	1								473	5.8	1.1	3.9	5.6	3
474	4.5	0.7	2.9	5.4	3								474	6.7	1.3	3.7	8.1	3
475	6.7	1.4	4.2	6.6	3								475	7.5	1.3	5.2	7.7	3
476	5.7	1	3.7	6.1	3								476	6.9	1.2	4.7	7.1	3
477	6.2	1.3	3.7	6.4	1								477	5.1	0.7	3.7	5.4	3
478	5.2	1.1	2.6	6.4	3								478	6.9	1.2	4.5	7.2	3
479	6.7	1.2	4.6	7	3								479	6	1.1	3.8	6.4	3
480	5.4	1.1	3.2	5.8	1								480	7.1	1.2	5.3	6.8	3
481	5.9	1.1	4.7	4.5	3								481	4.8	0.7	3.5	5.3	3
482	6.3	1.3	4.5	5.2	3								482	5.7	0.9	4	6.3	1
483	5.6	1.2	3	6.5	3								483	6.3	1.1	4.2	6.4	4
484	6.7	1.1	5.3	5.8	3								484	4.2	0.7	3.4	3.6	3
485	6.8	1.6	4.1	6.1	1								485	6.6	1.2	4.4	6.9	1
486	7	1.7	3.5	7.7	3								486	6.9	1.3	4.8	6.1	1
487	5.8	1.2	3.5	5.8	3								487	5.9	0.8	5.3	4.6	3
488	5.4	1	2.9	6.6	3								488	5	0.6	4.4	4.3	3
489	5.6	1	3.2	6.8	1								489	5.3	1	3.2	6.2	3
490	6.3	1.1	4.1	6.8	3								490	6.9	1.5	4.5	5.9	1
491	5.5	0.8	3.7	6.5	4								491	6.2	1.3	3.7	6.3	1
492	5.8	1	4.2	5.4	3								492	6	0.9	4.8	5.5	3
493	6.5	1.3	3.4	7.8	1								493	5.3	0.9	4.1	4.3	3
494	7.5	1.8	4.4	6.8	1								494	7.1	1.5	4.3	6.9	3
495	6.4	1.5	4.1	5.5	1								495	7.7	1.5	4.9	7.9	3
496	5.7	1.2	3.5	5.6	3								496	5.7	0.9	3.7	6.5	1
497	7.3	1.3	5.6	5.9	1								497	6.4	1.2	4.9	5.1	3
498	5.7	1.2	3.4	5.9	3								498	9.9	2.2	5.4	11	3
499	6.7	1.5	3.9	7	1								499	7.4	1.1	5.5	7.6	3
500	6.8	1.2	4.3	7.5	1								500	5.9	1	4.4	5.4	3
501	5.2	1.2	2.8	5.7	3								501	7.9	1.4	6	6.6	3
502	6.5	1.5	3.7	6.2	3								502	6.2	1.3	3.9	5.7	3
503	6.1	1.2	3.7	6.6	3								503	7.6	1.4	5.7	6.5	3
504	6.6	1.8	3	6.7	3								504	5.7	1.1	3.9	5.6	1
505	6.3	1.3	3.9	6.3	3								505	6.1	1.2	4.1	5.9	1
506	7.3	1.7	4.1	7.3	3								506	6	0.9	5	5	1
507	5.8	1.3	2.9	6.7	3								507	6.4	1.2	4.7	5.5	3
508	7	1.7	3.7	7	1								508	6.9	1.2	5.2	6.3	1
509	6.8	1.6	3.4	7.7	3								509	8.6	1.7	6.5	6.7	3
510	4.9	1.1	3.1	4.3	3								510	4.6	0.4	4.5	3.9	3
511	6.5	1.7	3.1	6.8	3								511	4.9	0.8	4.1	3.7	4
512	8.2	2.1	4.1	8.4	1								512	5.9	1.1	4.4	5	1
513	5.4	1.2	2.9	5.7	3								513	5.8	1	3.5	6.9	3
514	4.8	0.9	2.9	5.2	4								514	5.7	1	3.3	6.8	3
515	7.1	1.6	4.3	6.9	3								515	6.6	1.2	4.2	7.4	3
516	6.1	1.4	3	7.1	3								516	6	1	4.5	5.8	3
517	5.4	1.4	2.7	5.6	1								517	5.3	1	4.1	4.2	3
518	5.6	1.3	2.9	6	1								518	5.2	0.7	4.5	4.7	3
519	6.6	1.1	4.6	6.7	1								519	6.9	1.4	4	7.5	3
520	6	1.3	3.3	6.7	1								520	7.2	1.2	5.2	7	3
521	6.6	1.4	4.5	5.8	1								521	6.4	0.9	4.9	6.7	3
522	8.3	1.8	5.8	6.9	3								522	5.1	0.8	3.9	4.6	3
523	6.8	1.7	3.5	6.6	1								523	4.7	0.7	4.2	3.6	3
524	5.5	1	3.6	5.7	3								524	7.4	1.1	5.3	7.9	1
525	6.3	1.3	3	8.2	3								525	6.6	1	5.1	6.1	3
526	6.4	1.4	4.2	5.6	1								526	6.5	1.4	4.2	6	3
527	5.9	1	3.9	6.3	1								527	5.4	0.7	3.8	6.3	3
528	5.9	1	3.6	6.9	3								528	8.1	1.5	5.2	8.6	3
529	6.3	1.3	3.8	6.4	1								529	6.3	1.1	4.7	5.6	3
530	5.5	1.1	3	6.6	4								530	5.4	1	3.5	5.6	3
531	6.7	1.4	4.5	6.3	3								531	5.6	0.9	4.4	4.9	3
532	5.6	1.2	2.8	6.6	3								532	6.8	1	4.4	8.4	1
533	5.2	1	3.1	5.6	1								533	7	1.2	4.4	8	3
534	5.6	1.2	3	6.5	3								534	5.1	0.9	3.4	5.2	3
535	5.7	1.3	3.1	6.1	3								535	6.8	1.2	5.1	5.8	1
536	5.8	1.1	3.6	6.3	1								536	7	1.6	4.5	5.9	1
537	5.8	1.1	3.8	5.9	1								537	7.6	1.5	5.2	7.2	1
538	6	1.1	3.7	6.6	1								538	8.1	1.6	6	6.3	1
539	4.1	0.7	2.9	3.9	3								539	7.6	1.6	4.7	7.7	3
540	5.3	1.3	2.6	5.8	3								540	8.7	2	5.2	7.9	3
541	5.6	1	3.2	6.7	1								541	8.6	1.7	6.3	7.1	1
542	4.4	0.8	3.4	3.4	3								542	6.6	1	5	6.8	3
543	5.9	1	4	6	3								543	7.8	1.6	5.6	6.7	3
544	6.1	0.9	4.1	7.1	3								544	6	1.1	4.6	4.7	3
545	5.4	1	3.2	6.2	3								545	5.3	0.8	3.8	5.7	3
546	5.3	1.1	3.4	5.1	3								546	8.9	1.7	5.9	8.4	3
547	6.2	1.2	4.2	5.7	1								547	6.3	1	5.1	5.6	3
548	5.4	1	3.3	6	1								548	6.9	1.2	5.4	5.5	3
549	5.3	1.2	3.2	4.9	1								549	5.6	0.7	4.6	5.6	3
550	3.8	0.7	1.9	5	3								550	6.4	0.8	5.1	6.7	1
551	4.8	0.7	4.6	3	3								551	7.2	1.2	5	7.7	1
552	5.3	1	3.3	5.6	1								552	7.3	1.6	4.4	7	1
553	5.5	0.9	3.7	6.3	1								553	8.5	1.7	5.4	8.6	3
554	5.5	1	4	5	1								554	6.5	1.2	5	5	3
555	4.8	0.7	3.6	4.8	3								555	7.5	1.5	4.1	9.1	3
556	3	0.3	2.4	3.7	3								556	6.5	1.4	4.4	5.7	1
													557	6.4	1.1	4.8	5.7	3
													558	6.8	1.2	5	6.3	4
													559	5.8	0.8	5	4.7	3
													560	8	1.6	5.5	7.2	1
													561	7	1.2	5.1	6.8	3
													562	6.9	1.4	4.9	6	3
													563	6.8	1.2	5	6.1	3
													564	7.7	1.4	5.7	7	1
													565	6.1	0.8	5.6	4.9	3
													566	6.2	1.2	3.7	6.7	3
													567	8.5	1.8	5.4	8	3
													568	7.2	1.4	4.9	6.7	3
													569	7.1	0.9	6.2	6.1	3
													570	6.4	1.2	5	5	3
													571	7.3	1.1	5.1	8.4	4
													572	6.2	1.1	4.7	5.4	3
													573	7.4	1.2	5.8	6.6	3
													574	8.1	1.5	5.7	7.4	3
													575	6.6	0.9	5.6	5.9	3
													576	4.2	0.5	3.8	3.6	3
													577	8.2	1.7	5.6	7.2	3
													578	6.7	1.3	4.7	5.8	3
													579	7.5	1.3	5.7	6.5	3
													580	8.9	1.7	5.8	9.1	3
													581	5.5	0.8	4.4	5.4	4
													582	5.1	0.7	4.4	4.2	4
													583	9.3	1.9	6.8	7.2	1
													584	8.7	2.1	5.6	6.8	1
													585	5.1	0.6	4.5	5	3
													586	8.5	1.4	6.2	8.3	3
													587	8.2	1.4	7	6	3
													588	4.7	0.6	4.4	3.6	3
													589	7.5	1.5	5.3	6.2	1
													590	8.3	1.4	7	6.2	3
													591	8.3	1.5	6.8	6.1	1
													592	6.6	1.4	4.3	6.3	3
													593	7.6	1.6	5.4	6.2	3
													594	6.3	0.9	5.5	5	3
													595	6.2	1.3	4.1	5.8	3
													596	6.1	0.9	4.6	6.2	3
													597	4.3	0.5	4.1	3.2	3
													598	5.7	0.9	4.6	4.8	3
													599	5.9	0.9	4.8	5	3
													600	6.6	1	5.6	5.6	3
													601	6.7	0.9	6.7	3.8	3
													602	5.9	0.6	5.6	4.9	3
													603	7	1.2	5.3	6.3	3
													604	6.9	0.9	6.4	5	1
													605	6.2	0.9	5.1	5.2	1
													606	8.6	1.2	7.8	6.5	1
													607	4.6	0.6	4.6	3.1	3
													608	5.6	0.7	5	4.4	3
													609	6.1	0.9	5.1	5.1	3
													610	6.5	1.2	4.8	5.4	3
													611	6.1	1.3	4.9	3.7	3
													612	6.8	1.4	5.2	4.8	3
													613	5.7	0.9	4.7	4.5	3
													614	3.7	0.4	3.7	2.4	3
													615	6.2	1.2	5	4.5	3
													616	6.9	1.3	4.7	6.5	3
													617	8.3	1.6	7.5	3.9	1
													618	8.3	1.8	6.2	5.9	1
													619	9.3	1.9	7.3	6.7	3
													620	6.9	1.4	4.5	6.5	3
